# Supplementary material
Source: PubMed Central journal article supplement (PMC6868463)
Supplement: DC190532SupplementaryData.pdf [file DC190532SupplementaryData.pdf]

SUPPLEMENTARY DATA

**Supplementary Figure 1. Geographic distribution of PORTAL clinical practices. KP, Kaiser Permanente; k, thousand(s); m, million(s).**

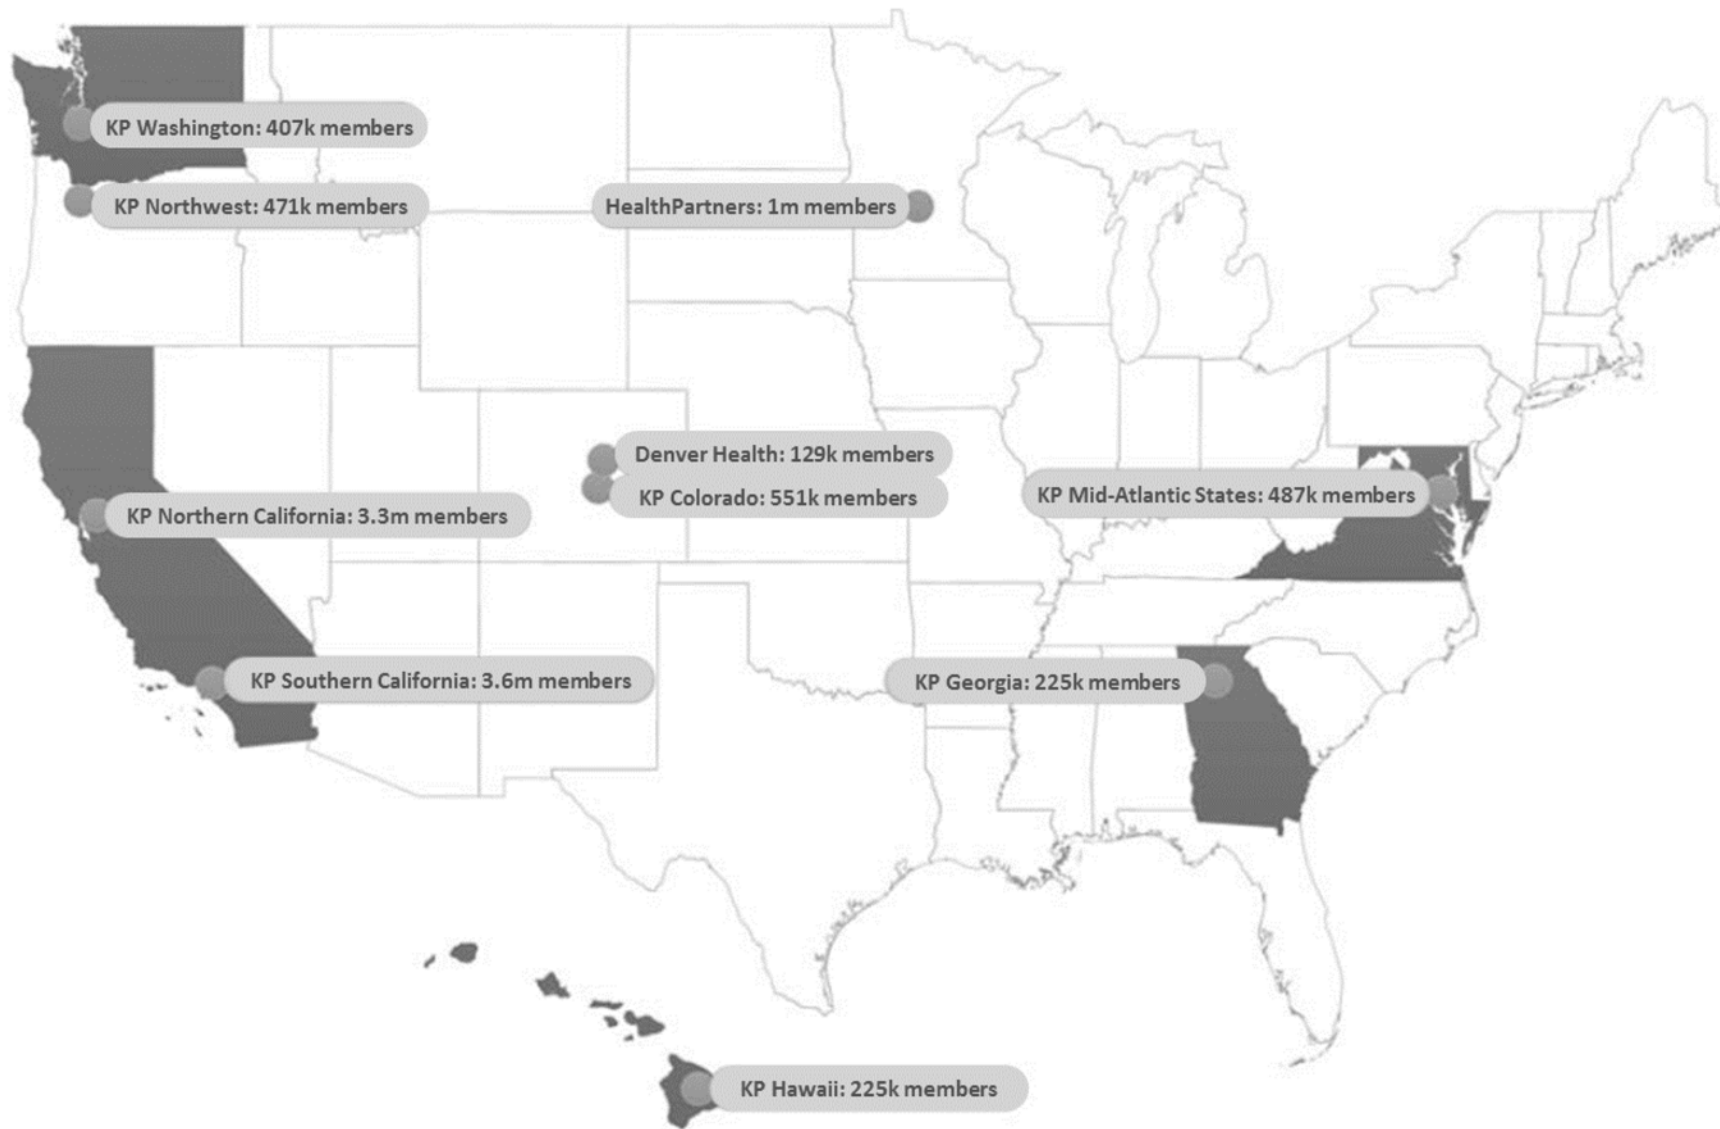

SUPPLEMENTARY DATA

**Supplementary Figure 2. PORTAL 2012-2013 flow chart to construct the analytical cohort.**

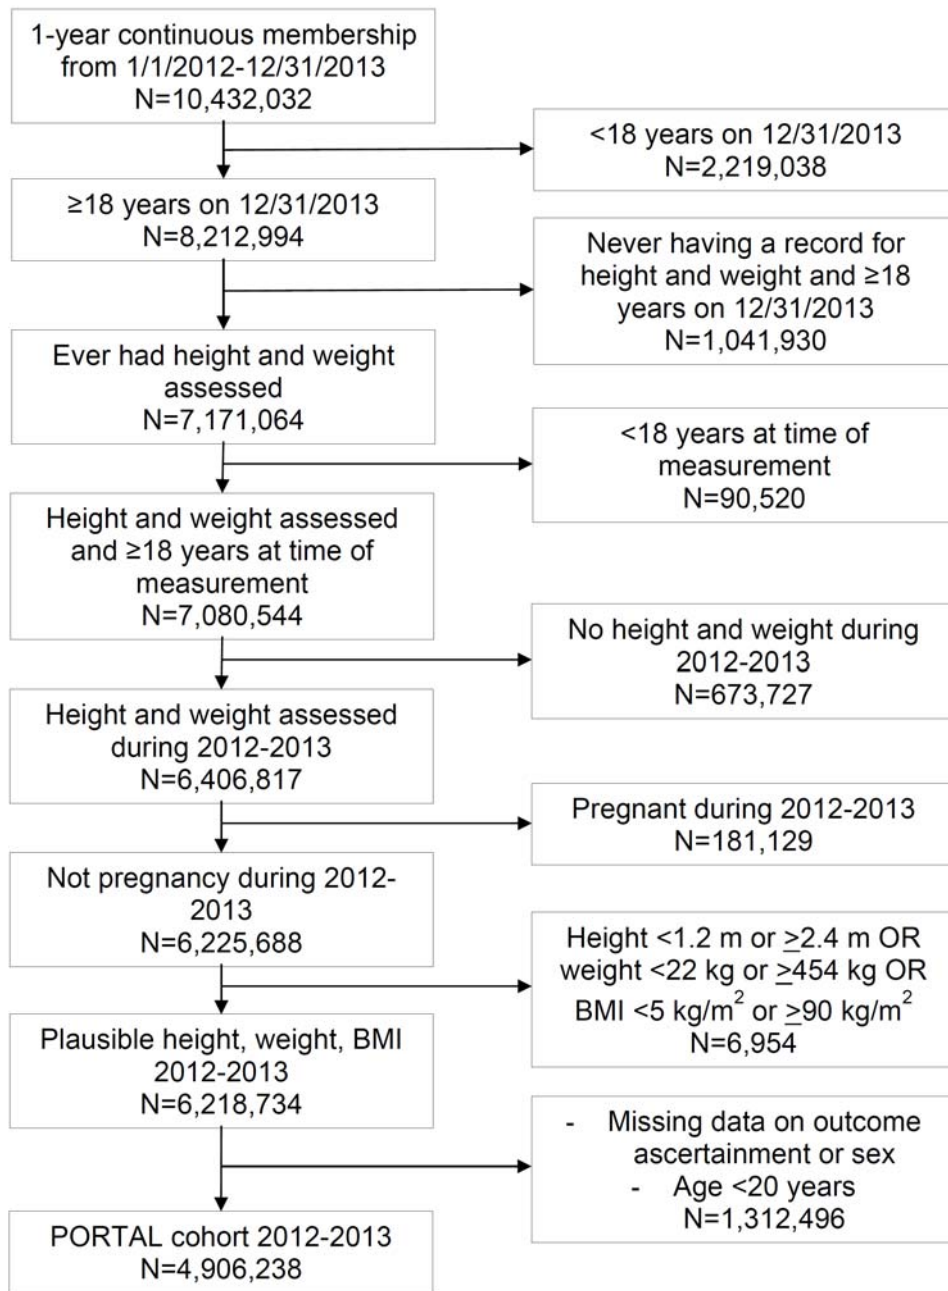

SUPPLEMENTARY DATA

**Supplementary Figure 3. Age group specific prevalence of (A) diabetes and (B) prediabetes by race/ethnicity per 100 PORTAL cohort members**

P-for-trend across age groups among all racial/ethnic groups were  $<0.001$ , after adjusting for multiple comparisons using the false discovery rate method.

SUPPLEMENTARY DATA

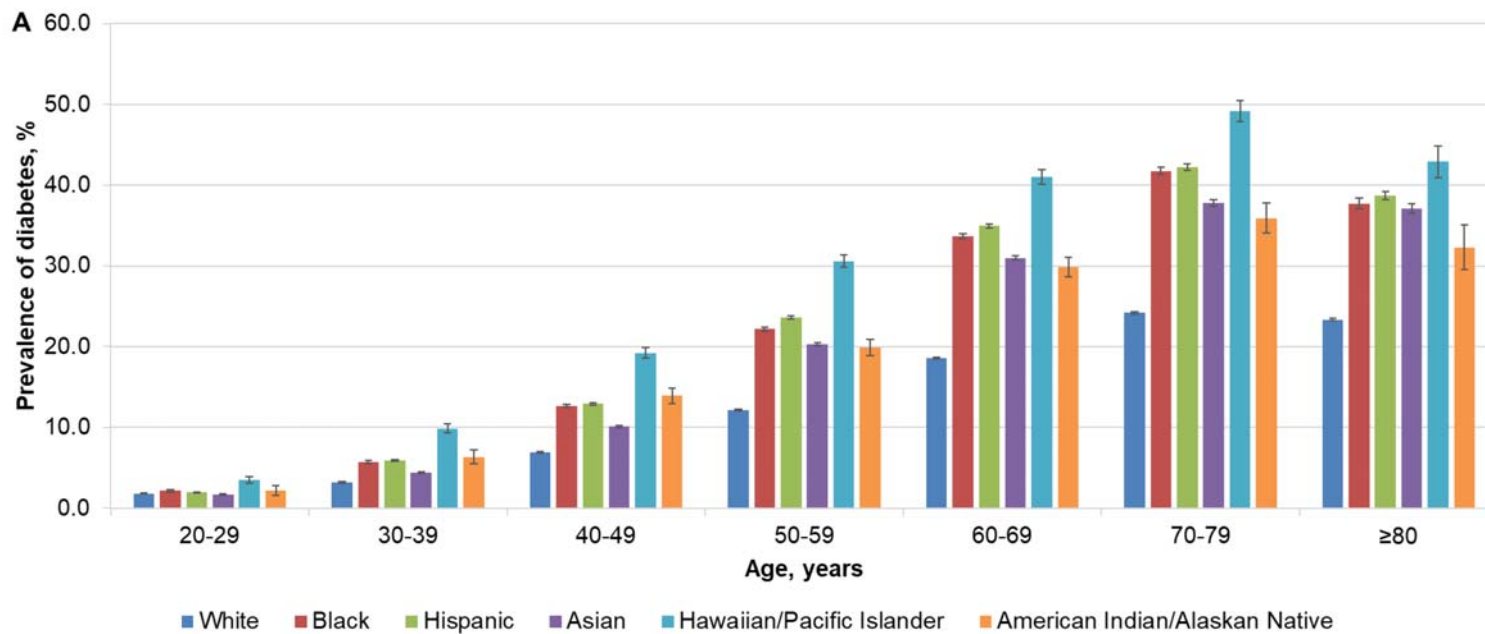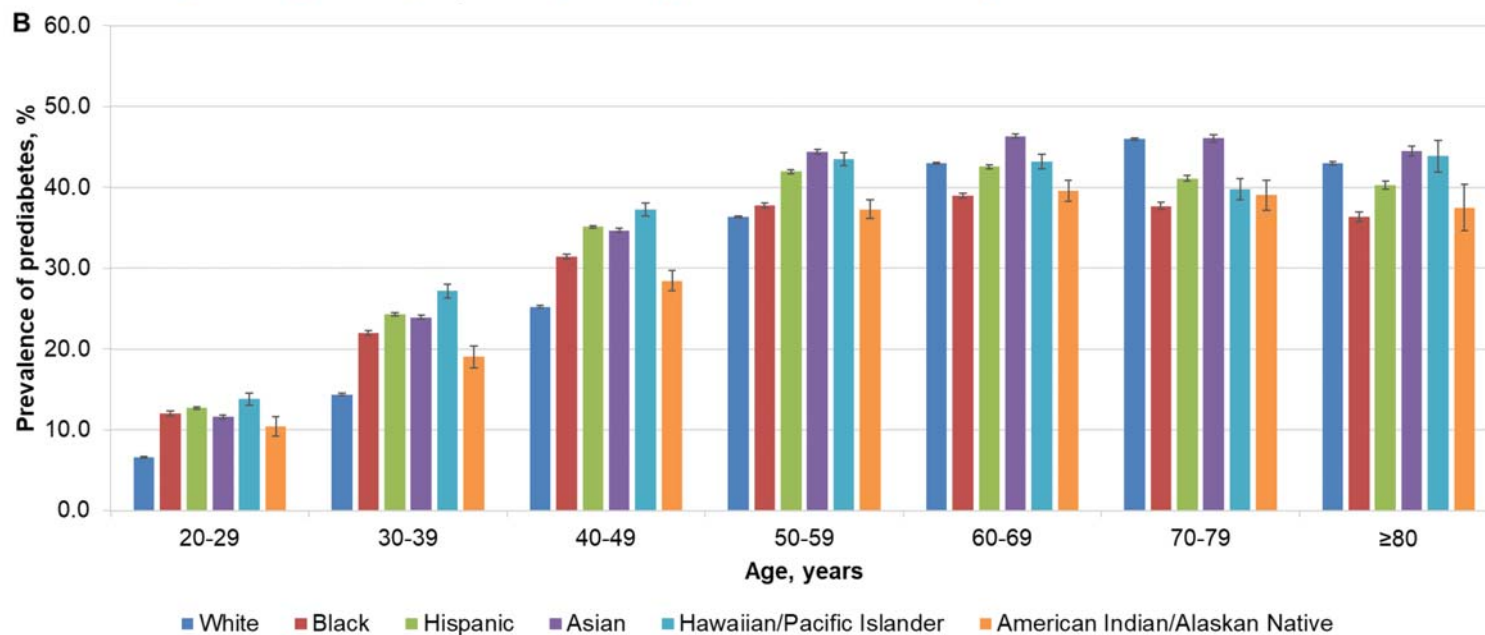

SUPPLEMENTARY DATA

**Supplementary Table 1. Age-standardized prevalence of diabetes by race/ethnicity, BMI category, and sex per 100 PORTAL cohort members**

|                           | White             | Black             | Hispanic          | Asian             | Native Hawaiian/<br>Other Pacific Islander | American Indian/<br>Alaskan Native | All               |
|---------------------------|-------------------|-------------------|-------------------|-------------------|--------------------------------------------|------------------------------------|-------------------|
| <b>Male, % (95% CI)</b>   |                   |                   |                   |                   |                                            |                                    |                   |
| <b>No.</b>                | 1,103,412         | 186,819           | 460,062           | 265,348           | 30,454                                     | 10,938                             | 2,174,165         |
| <b>Overall prevalence</b> | 14.6 (14.5, 14.7) | 23.7 (23.6, 23.9) | 25.0 (24.8, 25.1) | 22.7 (22.6, 22.9) | 30.4 (29.9, 30.9)                          | 22.1 (21.3, 22.8)                  | 18.4 (18.3, 18.5) |
| <b>Body mass index*</b>   |                   |                   |                   |                   |                                            |                                    |                   |
| Underweight               | 7.3 (6.4, 8.1)    | 12.4 (10.4, 14.4) | 15.7 (12.9, 18.5) | 10.4 (9.2, 11.6)  | 13.8 (7.3, 20.3)                           | 16.8 (1.3, 32.3)                   | 9.4 (8.8, 10.0)   |
| Normal weight             | 7.4 (7.3, 7.5)    | 16.1 (15.7, 16.5) | 17.4 (17.1, 17.7) | 13.4 (13.0, 13.7) | 22.4 (21.4, 23.5)                          | 12.7 (11.3, 14.2)                  | 10.3 (10.2, 10.4) |
| Overweight                | 10.9 (10.8, 11.0) | 20.0 (19.7, 20.2) | 21.2 (21.0, 21.4) | 20.5 (20.3, 20.7) | 25.8 (25.0, 26.6)                          | 17.2 (16.1, 18.3)                  | 15.0 (14.9, 15.1) |
| Obese class 1             | 18.6 (18.4, 18.7) | 27.1 (26.7, 27.5) | 27.9 (27.6, 28.2) | 28.0 (27.7, 28.4) | 33.6 (32.5, 34.8)                          | 24.6 (23.0, 26.1)                  | 22.6 (22.5, 22.7) |
| Obese class 2             | 27.9 (27.7, 28.2) | 34.4 (33.7, 35.1) | 36.5 (36.0, 37.0) | 38.8 (38.0, 39.6) | 41.7 (39.8, 43.6)                          | 33.8 (31.2, 36.5)                  | 31.5 (31.3, 31.7) |
| Obese class 3             | 36.1 (35.7, 36.6) | 40.7 (39.6, 41.7) | 43.4 (42.5, 44.3) | 49.5 (47.8, 51.3) | 48.5 (46.4, 50.6)                          | 40.8 (35.6, 46.1)                  | 39.1 (38.8, 39.5) |
| Obese class 4             | 43.1 (41.5, 44.8) | 41.3 (38.2, 44.4) | 52.7 (50.8, 54.7) | 54.3 (49.5, 59.1) | 51.2 (46.2, 56.1)                          | 43.0 (33.4, 52.5)                  | 44.9 (43.6, 46.1) |
| <b>P-for-trend†</b>       | <0.001            | <0.001            | <0.001            | <0.001            | <0.001                                     | <0.001                             | <0.001            |
| <b>Female, % (95% CI)</b> |                   |                   |                   |                   |                                            |                                    |                   |
| <b>No.</b>                | 1,350,976         | 281,175           | 598,289           | 355,465           | 36,736                                     | 15,386                             | 2,732,073         |
| <b>Overall prevalence</b> | 10.1 (10.0, 10.2) | 19.9 (19.8, 20.0) | 20.0 (19.8, 20.1) | 16.8 (16.7, 16.9) | 25.4 (25.0, 25.9)                          | 17.7 (17.1, 18.3)                  | 13.9 (13.8, 14.0) |
| <b>Body mass index*</b>   |                   |                   |                   |                   |                                            |                                    |                   |
| Underweight               | 2.8 (2.6, 3.0)    | 8.5 (7.4, 9.7)    | 7.0 (6.1, 8.0)    | 6.7 (6.3, 7.1)    | 9.2 (6.3, 12.0)                            | 5.7 (2.5, 9)                       | 4.4 (4.2, 4.6)    |
| Normal weight             | 3.7 (3.7, 3.8)    | 11.6 (11.3, 11.9) | 10.8 (10.6, 11.0) | 8.8 (8.7, 9.0)    | 15.8 (15.1, 16.5)                          | 8.0 (7.1, 8.8)                     | 5.8 (5.7, 5.8)    |
| Overweight                | 7.8 (7.7, 7.9)    | 15.9 (15.7, 16.1) | 16.6 (16.4, 16.8) | 16.4 (16.3, 16.6) | 23.4 (22.7, 24.2)                          | 14.1 (13.1, 15.1)                  | 11.8 (11.7, 11.8) |
| Obese class 1             | 14.1 (14.0, 14.2) | 21.2 (20.9, 21.5) | 23.4 (23.2, 23.7) | 24.9 (24.6, 25.3) | 30.8 (29.7, 31.8)                          | 21.4 (20.0, 22.7)                  | 18.4 (18.3, 18.5) |
| Obese class 2             | 20.4 (20.2, 20.6) | 25.9 (25.5, 26.4) | 30.1 (29.7, 30.5) | 33.6 (32.8, 34.3) | 36.5 (34.9, 38.1)                          | 26.9 (24.9, 29.0)                  | 24.4 (24.3, 24.6) |
| Obese class 3             | 27.5 (27.2, 27.8) | 30.1 (29.6, 30.7) | 37.0 (36.4, 37.6) | 40.3 (38.9, 41.7) | 41.5 (39.3, 43.7)                          | 29.8 (26.8, 32.8)                  | 30.6 (30.3, 30.8) |
| Obese class 4             | 35.1 (34.2, 36.0) | 35.4 (33.8, 36.9) | 45.5 (43.8, 47.2) | 46.2 (42.6, 49.8) | 42.0 (37.8, 46.3)                          | 39.9 (31.8, 47.9)                  | 37.3 (36.6, 38.0) |
| <b>P-for-trend†</b>       | <0.001            | <0.001            | <0.001            | <0.001            | <0.001                                     | <0.001                             | <0.001            |

\*For non-Asians: underweight (body mass index <18.5 kg/m<sup>2</sup>), normal weight (18.5-24.9 kg/m<sup>2</sup>), overweight (25.0-29.9 kg/m<sup>2</sup>), and obese classes 1-4 (30.0-34.9, 35.0-39.9, 40.0-49.9, ≥50.0 kg/m<sup>2</sup>); for Asians: underweight (<18.5 kg/m<sup>2</sup>), normal weight (18.5-22.9 kg/m<sup>2</sup>), overweight (23.0-27.4 kg/m<sup>2</sup>), obese classes 1-4 (27.5-32.4, 32.5-37.4, 37.5-47.4, ≥47.5 kg/m<sup>2</sup>).

†P-for-trend was adjusted for multiple comparisons using the false discovery rate method.

SUPPLEMENTARY DATA

**Supplementary Table 2. Age-standardized prevalence of prediabetes by race/ethnicity, BMI category, and sex per 100 PORTAL cohort members**

|                           | White             | Black             | Hispanic          | Asian             | Native Hawaiian/<br>Other Pacific Islander | American Indian/<br>Alaskan Native | All               |
|---------------------------|-------------------|-------------------|-------------------|-------------------|--------------------------------------------|------------------------------------|-------------------|
| <b>Male, % (95% CI)</b>   |                   |                   |                   |                   |                                            |                                    |                   |
| <b>No.</b>                | 1,103,412         | 186,819           | 460,062           | 265,348           | 30,454                                     | 10,938                             | 2,174,165         |
| <b>Overall prevalence</b> | 34.6 (34.5, 34.6) | 33.6 (33.4, 33.9) | 37.5 (37.4, 37.7) | 40.6 (40.4, 40.8) | 37.9 (37.4, 38.5)                          | 33.8 (32.9, 34.7)                  | 36.5 (36.4, 36.7) |
| <b>Body mass index*</b>   |                   |                   |                   |                   |                                            |                                    |                   |
| Underweight               | 24.8 (23.4, 26.3) | 27.9 (25.2, 30.6) | 27.4 (23.8, 31.0) | 33.5 (31.5, 35.4) | 27.0 (17.2, 36.8)                          | 20.3 (3.5, 37.0)                   | 27.9 (26.9, 28.8) |
| Normal weight             | 29.8 (29.7, 30.0) | 29.8 (29.3, 30.3) | 33.8 (33.4, 34.2) | 38.2 (37.7, 38.7) | 36.5 (35.3, 37.8)                          | 31.9 (29.9, 33.9)                  | 31.7 (31.6, 31.8) |
| Overweight                | 34.9 (34.8, 35.1) | 33.7 (33.3, 34.0) | 37.8 (37.6, 38.0) | 41.1 (40.8, 41.3) | 39.1 (38.2, 40.0)                          | 34.7 (33.2, 36.1)                  | 37.0 (36.9, 37.1) |
| Obese class 1             | 36.9 (36.7, 37.1) | 34.7 (34.3, 35.2) | 38.5 (38.2, 38.8) | 40.8 (40.4, 41.2) | 37.1 (35.9, 38.3)                          | 34.2 (32.4, 36.0)                  | 38.3 (38.2, 38.5) |
| Obese class 2             | 35.9 (35.6, 36.2) | 34.0 (33.3, 34.7) | 36.3 (35.8, 36.8) | 37.7 (36.8, 38.5) | 34.2 (32.3, 36.1)                          | 33.2 (30.4, 36.0)                  | 36.7 (36.5, 36.9) |
| Obese class 3             | 34.3 (33.8, 34.8) | 33.2 (32.1, 34.3) | 34.6 (33.7, 35.5) | 32.4 (30.7, 34.1) | 33.6 (31.5, 35.6)                          | 31.8 (26.5, 37.0)                  | 34.8 (34.4, 35.2) |
| Obese class 4             | 31.9 (30.4, 33.4) | 36.6 (33.5, 39.7) | 30.2 (28.4, 31.9) | 28.8 (24.1, 33.5) | 32.6 (27.6, 37.5)                          | 28.7 (19.1, 38.3)                  | 33.3 (32.2, 34.5) |
| <b>P-for-trend†</b>       | 0.505             | 0.505             | 0.819             | 0.505             | 0.819                                      | 0.505                              | 0.375             |
| <b>Female, % (95% CI)</b> |                   |                   |                   |                   |                                            |                                    |                   |
| <b>No.</b>                | 1,350,976         | 281,175           | 598,289           | 355,465           | 36,736                                     | 15,386                             | 2,732,073         |
| <b>Overall prevalence</b> | 28.1 (28.0, 28.2) | 30.9 (30.8, 31.1) | 33.6 (33.5, 33.7) | 34.6 (34.4, 34.7) | 35.7 (35.2, 36.2)                          | 29.2 (28.5, 29.9)                  | 31.0 (30.9, 31.1) |
| <b>Body mass index*</b>   |                   |                   |                   |                   |                                            |                                    |                   |
| Underweight               | 20.5 (19.9, 21.0) | 21.7 (19.9, 23.6) | 23.2 (21.6, 24.8) | 28.9 (28.1, 29.7) | 30.4 (26.0, 34.8)                          | 17.8 (12.3, 23.2)                  | 23.2 (22.8, 23.6) |
| Normal weight             | 21.8 (21.7, 22.0) | 25.0 (24.6, 25.4) | 27.4 (27.1, 27.6) | 31.3 (31.0, 31.6) | 32.5 (31.7, 33.4)                          | 23.4 (22.1, 24.7)                  | 24.5 (24.4, 24.6) |
| Overweight                | 28.2 (28.1, 28.3) | 29.1 (28.8, 29.4) | 33.5 (33.3, 33.7) | 35.5 (35.3, 35.8) | 35.9 (35.0, 36.7)                          | 28.5 (27.2, 29.8)                  | 31.4 (31.3, 31.5) |
| Obese class 1             | 32.9 (32.7, 33.0) | 32.2 (31.9, 32.6) | 36.5 (36.2, 36.8) | 37.5 (37.2, 37.9) | 37.0 (35.8, 38.2)                          | 30.7 (29.1, 32.3)                  | 34.9 (34.8, 35.1) |
| Obese class 2             | 34.9 (34.7, 35.2) | 33.9 (33.4, 34.4) | 37.0 (36.6, 37.4) | 36.6 (35.9, 37.4) | 35.9 (34.3, 37.6)                          | 34.2 (31.9, 36.5)                  | 36.1 (35.9, 36.3) |
| Obese class 3             | 35.4 (35.1, 35.8) | 35.2 (34.6, 35.8) | 36.0 (35.4, 36.5) | 35.2 (33.9, 36.6) | 34.9 (32.7, 37.0)                          | 35.7 (32.4, 39.0)                  | 36.1 (35.9, 36.4) |
| Obese class 4             | 36.4 (35.5, 37.3) | 36.8 (35.3, 38.3) | 34.6 (32.9, 36.2) | 30.6 (25.2, 36.0) | 39.5 (35.3, 43.7)                          | 36.2 (30.8, 41.6)                  | 36.7 (36.0, 37.3) |
| <b>P-for-trend†</b>       | 0.002             | 0.008             | 0.051             | 0.58              | 0.245                                      | 0.002                              | 0.006             |

\*For non-Asians: underweight (body mass index <18.5 kg/m<sup>2</sup>), normal weight (18.5-24.9 kg/m<sup>2</sup>), overweight (25.0-29.9 kg/m<sup>2</sup>), and obese classes 1-4 (30.0-34.9, 35.0-39.9, 40.0-49.9, ≥50.0 kg/m<sup>2</sup>); for Asians: underweight (<18.5 kg/m<sup>2</sup>), normal weight (18.5-22.9 kg/m<sup>2</sup>), overweight (23.0-27.4 kg/m<sup>2</sup>), obese classes 1-4 (27.5-32.4, 32.5-37.4, 37.5-47.4, ≥47.5 kg/m<sup>2</sup>).

†P-for-trend was adjusted for multiple comparisons using the false discovery rate method.

SUPPLEMENTARY DATA

**Supplementary Table 3. Adjusted odds ratios for risk of diabetes in association with body mass index categories and other characteristics by race/ethnicity, the PORTAL network, 2012-2013\***

|                                   | White               | Black               | Hispanic            | Asian               | Hawaiian/Pacific<br>Islander | American<br>Indian/Alaskan<br>Native | All <sup>†</sup>    |
|-----------------------------------|---------------------|---------------------|---------------------|---------------------|------------------------------|--------------------------------------|---------------------|
| <b>Body mass index</b>            |                     |                     |                     |                     |                              |                                      |                     |
| Underweight                       | 0.76 (0.73-0.80)    | 0.71 (0.66-0.77)    | 0.76 (0.70-0.83)    | 0.83 (0.79-0.88)    | 0.68 (0.56-0.82)             | 0.87 (0.60-1.27)                     | 0.75 (0.73-0.77)    |
| Normal weight                     | 1.00 (reference)             | 1.00 (reference)                     | 1.00 (reference)    |
| Overweight                        | 2.88 (2.85-2.91)    | 1.74 (1.71-1.77)    | 1.94 (1.92-1.97)    | 2.61 (2.56-2.66)    | 1.80 (1.73-1.88)             | 2.27 (2.08-2.48)                     | 1.58 (1.57-1.59)    |
| Obese class 1                     | 4.27 (4.22-4.32)    | 2.19 (2.15-2.24)    | 2.65 (2.61-2.69)    | 3.80 (3.72-3.89)    | 2.29 (2.19-2.39)             | 3.09 (2.82-3.39)                     | 2.42 (2.40-2.43)    |
| Obese class 2                     | 5.76 (5.69-5.83)    | 2.65 (2.59-2.71)    | 3.43 (3.38-3.49)    | 5.11 (4.97-5.26)    | 2.75 (2.62-2.88)             | 3.73 (3.38-4.11)                     | 3.41 (3.38-3.43)    |
| Obese class 3                     | 5.76 (5.69-5.83)    | 2.65 (2.59-2.71)    | 3.43 (3.38-3.49)    | 5.11 (4.97-5.26)    | 2.75 (2.62-2.88)             | 3.73 (3.38-4.11)                     | 4.43 (4.39-4.46)    |
| Obese class 4                     | 7.64 (7.50-7.79)    | 3.16 (3.05-3.27)    | 4.53 (4.41-4.67)    | 6.26 (5.83-6.72)    | 3.19 (2.95-3.45)             | 4.85 (4.24-5.55)                     | 5.65 (5.57-5.72)    |
| P-for-trend <sup>‡</sup>          | <0.001              | <0.001              | <0.001              | <0.001              | <0.001                       | <0.001                               | <0.001              |
| <b>Age, years</b>                 |                     |                     |                     |                     |                              |                                      |                     |
| 20-29                             | 1.00 (reference)             | 1.00 (reference)                     | 1.00 (reference)    |
| 30-39                             | 1.46 (1.40-1.51)    | 2.37 (2.22-2.53)    | 2.75 (2.64-2.85)    | 2.54 (2.37-2.71)    | 2.57 (2.26-2.93)             | 2.50 (1.87-3.35)                     | 2.15 (2.10-2.20)    |
| 40-49                             | 3.00 (2.89-3.10)    | 5.07 (4.78-5.38)    | 5.98 (5.77-6.21)    | 5.86 (5.50-6.24)    | 5.10 (4.51-5.76)             | 5.25 (4.00-6.89)                     | 4.64 (4.55-4.74)    |
| 50-59                             | 5.22 (5.05-5.40)    | 8.99 (8.48-9.52)    | 11.01 (10.62-11.41) | 11.63 (10.93-12.38) | 8.45 (7.49-9.53)             | 7.62 (5.84-9.96)                     | 8.39 (8.22-8.56)    |
| 60-69                             | 8.28 (8.00-8.56)    | 14.14 (13.35-14.98) | 16.85 (16.25-17.47) | 18.20 (17.10-19.37) | 11.98 (10.63-13.50)          | 11.78 (9.03-15.37)                   | 13.07 (12.81-13.34) |
| 70-79                             | 11.76 (11.37-12.16) | 18.96 (17.90-20.09) | 22.09 (21.30-22.91) | 23.11 (21.71-24.59) | 15.40 (13.65-17.37)          | 14.97 (11.46-19.57)                  | 17.80 (17.43-18.16) |
| ≥80                               | 14.59 (14.10-15.09) | 19.97 (18.82-21.18) | 23.59 (22.72-24.49) | 25.33 (23.77-26.98) | 15.71 (13.85-17.82)          | 17.10 (12.98-22.54)                  | 20.61 (20.18-21.04) |
| <b>Sex</b>                        |                     |                     |                     |                     |                              |                                      |                     |
| Female                            | 1.00 (reference)             | 1.00 (reference)                     | 1.00 (reference)    |
| Male                              | 1.43 (1.42-1.44)    | 1.32 (1.31-1.33)    | 1.31 (1.30-1.32)    | 1.26 (1.24-1.27)    | 1.17 (1.15-1.20)             | 1.28 (1.23-1.34)                     | 1.36 (1.35-1.36)    |
| <b>Neighborhood education</b>     |                     |                     |                     |                     |                              |                                      |                     |
| >48% HS or lower                  | 1.42 (1.40-1.43)    | 1.20 (1.18-1.23)    | 1.35 (1.33-1.37)    | 1.36 (1.34-1.39)    | 1.31 (1.25-1.38)             | 1.34 (1.23-1.47)                     | 1.39 (1.38-1.40)    |
| 34-48% HS or lower                | 1.27 (1.26-1.28)    | 1.14 (1.12-1.16)    | 1.23 (1.21-1.25)    | 1.26 (1.24-1.28)    | 1.19 (1.13-1.24)             | 1.28 (1.18-1.38)                     | 1.27 (1.26-1.28)    |
| 23-33% HS or lower                | 1.18 (1.17-1.19)    | 1.08 (1.06-1.10)    | 1.13 (1.11-1.15)    | 1.16 (1.15-1.18)    | 1.13 (1.07-1.18)             | 1.17 (1.08-1.26)                     | 1.17 (1.16-1.18)    |
| <23% HS or lower                  | 1.00 (reference)             | 1.00 (reference)                     | 1.00 (reference)    |
| P-for-trend <sup>‡</sup>          | <0.001              | <0.001              | <0.001              | <0.001              | <0.001                       | <0.001                               | <0.001              |
| <b>Neighborhood poverty level</b> |                     |                     |                     |                     |                              |                                      |                     |
| <5% below threshold               | 1.00 (reference)             | 1.00 (reference)                     | 1.00 (reference)    |

## SUPPLEMENTARY DATA

|                          |                  |                  |                  |                  |                  |                  |                  |
|--------------------------|------------------|------------------|------------------|------------------|------------------|------------------|------------------|
| 5-9% below threshold     | 1.02 (1.02-1.03) | 1.02 (1.00-1.03) | 1.03 (1.01-1.04) | 1.00 (0.99-1.02) | 1.01 (0.97-1.04) | 0.99 (0.92-1.07) | 1.02 (1.01-1.03) |
| 10-19% below threshold   | 1.04 (1.03-1.05) | 1.03 (1.01-1.05) | 1.06 (1.05-1.08) | 1.00 (0.98-1.01) | 1.02 (0.98-1.06) | 1.05 (0.97-1.13) | 1.04 (1.03-1.04) |
| ≥20% below threshold     | 1.08 (1.07-1.09) | 1.05 (1.03-1.07) | 1.12 (1.10-1.13) | 0.99 (0.97-1.01) | 1.05 (1.00-1.09) | 1.09 (1.00-1.19) | 1.07 (1.06-1.08) |
| P-for-trend <sup>‡</sup> | <0.001           | <0.001           | <0.001           | 0.363            | 0.030            | 0.025            | <0.001           |

HS, high school.

\*Adjusted for all other characteristic variables in table, age, and site.

†Additionally adjusted for race/ethnicity.

‡P-for-trend was evaluated by using the median value for each category and fitting it as a continuous variable in the Poisson regression models using robust standard errors and adjusted by false discovery rate correction for multiple comparisons.



SUPPLEMENTARY DATA

**Supplementary Table 4. Adjusted odds ratios for risk of prediabetes in association with body mass index categories and other characteristics by race/ethnicity, the PORTAL network, 2012-2013\***

|                                   | White            | Black            | Hispanic         | Asian            | Hawaiian/Pacific<br>Islander | American<br>Indian/Alaskan<br>Native | All <sup>†</sup> |
|-----------------------------------|------------------|------------------|------------------|------------------|------------------------------|--------------------------------------|------------------|
| <b>Body mass index</b>            |                  |                  |                  |                  |                              |                                      |                  |
| Underweight                       | 0.94 (0.93-0.96) | 0.96 (0.91-1.01) | 0.88 (0.83-0.92) | 0.96 (0.93-0.98) | 0.91 (0.81-1.02)             | 0.71 (0.56-0.92)                     | 0.94 (0.93-0.96) |
| Normal weight                     | 1.00 (reference)             | 1.00 (reference)                     | 1.00 (reference) |
| Overweight                        | 1.24 (1.23-1.24) | 1.16 (1.15-1.18) | 1.26 (1.25-1.28) | 1.17 (1.16-1.18) | 1.12 (1.09-1.15)             | 1.21 (1.15-1.28)                     | 1.23 (1.22-1.23) |
| Obese class 1                     | 1.34 (1.34-1.35) | 1.26 (1.24-1.27) | 1.38 (1.37-1.40) | 1.22 (1.21-1.23) | 1.13 (1.10-1.17)             | 1.28 (1.21-1.35)                     | 1.33 (1.33-1.34) |
| Obese class 2                     | 1.37 (1.36-1.38) | 1.31 (1.29-1.33) | 1.44 (1.42-1.45) | 1.23 (1.21-1.25) | 1.12 (1.08-1.17)             | 1.33 (1.25-1.42)                     | 1.37 (1.37-1.38) |
| Obese class 3                     | 1.41 (1.40-1.42) | 1.38 (1.36-1.41) | 1.51 (1.49-1.53) | 1.25 (1.22-1.28) | 1.20 (1.15-1.25)             | 1.43 (1.32-1.54)                     | 1.43 (1.42-1.44) |
| Obese class 4                     | 1.49 (1.46-1.52) | 1.57 (1.53-1.62) | 1.63 (1.59-1.68) | 1.28 (1.18-1.39) | 1.32 (1.23-1.42)             | 1.60 (1.40-1.82)                     | 1.55 (1.53-1.57) |
| P-for-trend <sup>‡</sup>          | <0.001           | <0.001           | <0.001           | <0.001           | <0.001                       | <0.001                               | <0.001           |
| <b>Age, years</b>                 |                  |                  |                  |                  |                              |                                      |                  |
| 20-29                             | 1.00 (reference)             | 1.00 (reference)                     | 1.00 (reference) |
| 30-39                             | 2.09 (2.05-2.13) | 1.76 (1.72-1.81) | 1.83 (1.80-1.86) | 2.03 (1.98-2.08) | 1.93 (1.81-2.06)             | 1.74 (1.52-1.99)                     | 1.93 (1.91-1.95) |
| 40-49                             | 3.62 (3.55-3.68) | 2.47 (2.41-2.53) | 2.62 (2.58-2.66) | 2.93 (2.86-3.00) | 2.63 (2.48-2.80)             | 2.57 (2.27-2.92)                     | 2.90 (2.87-2.92) |
| 50-59                             | 5.19 (5.10-5.28) | 2.95 (2.88-3.02) | 3.13 (3.08-3.17) | 3.73 (3.64-3.81) | 3.07 (2.90-3.26)             | 3.40 (3.02-3.84)                     | 3.75 (3.72-3.78) |
| 60-69                             | 6.16 (6.05-6.26) | 3.07 (2.99-3.14) | 3.20 (3.15-3.25) | 3.87 (3.78-3.96) | 3.05 (2.87-3.24)             | 3.59 (3.18-4.05)                     | 4.21 (4.17-4.24) |
| 70-79                             | 6.65 (6.54-6.77) | 3.02 (2.95-3.10) | 3.18 (3.13-3.23) | 3.85 (3.75-3.94) | 2.82 (2.65-3.01)             | 3.61 (3.18-4.09)                     | 4.43 (4.39-4.47) |
| ≥80                               | 6.64 (6.52-6.76) | 3.09 (3.00-3.18) | 3.32 (3.26-3.39) | 3.80 (3.70-3.90) | 3.21 (2.99-3.45)             | 3.72 (3.24-4.27)                     | 4.51 (4.47-4.55) |
| <b>Sex</b>                        |                  |                  |                  |                  |                              |                                      |                  |
| Female                            | 1.00 (reference)             | 1.00 (reference)                     | 1.00 (reference) |
| Male                              | 1.16 (1.15-1.16) | 1.11 (1.10-1.12) | 1.14 (1.13-1.14) | 1.16 (1.15-1.17) | 1.07 (1.05-1.09)             | 1.12 (1.08-1.16)                     | 1.15 (1.15-1.15) |
| <b>Neighborhood education</b>     |                  |                  |                  |                  |                              |                                      |                  |
| >48% HS or lower                  | 0.98 (0.97-0.98) | 0.99 (0.97-1.00) | 0.98 (0.97-0.99) | 0.95 (0.94-0.96) | 0.96 (0.93-1.00)             | 0.97 (0.92-1.04)                     | 0.98 (0.97-0.98) |
| 34-48% HS or lower                | 0.99 (0.98-0.99) | 0.99 (0.98-1.01) | 0.99 (0.98-1.00) | 0.97 (0.96-0.98) | 0.98 (0.95-1.02)             | 0.98 (0.93-1.03)                     | 0.99 (0.98-0.99) |
| 23-33% HS or lower                | 1.00 (1.00-1.00) | 1.01 (0.99-1.02) | 1.00 (0.99-1.01) | 0.99 (0.98-0.99) | 0.98 (0.95-1.01)             | 1.00 (0.95-1.05)                     | 1.00 (0.99-1.00) |
| <23% HS or lower                  | 1.00 (reference)             | 1.00 (reference)                     | 1.00 (reference) |
| P-for-trend <sup>‡</sup>          | <0.001           | 0.040            | <0.001           | <0.001           | 0.058                        | 0.355                                | <0.001           |
| <b>Neighborhood poverty level</b> |                  |                  |                  |                  |                              |                                      |                  |
| <5% below threshold               | 1.00 (reference)             | 1.00 (reference)                     | 1.00 (reference) |
| 5-9% below threshold              | 1.00 (0.99-1.00) | 1.00 (0.99-1.02) | 1.00 (1.00-1.01) | 1.00 (0.99-1.01) | 0.98 (0.95-1.01)             | 0.99 (0.95-1.05)                     | 1.00 (0.99-1.00) |

## SUPPLEMENTARY DATA

|                          |                  |                  |                  |                  |                  |                  |                  |
|--------------------------|------------------|------------------|------------------|------------------|------------------|------------------|------------------|
| 10-19% below threshold   | 0.99 (0.98-0.99) | 0.99 (0.98-1.00) | 0.99 (0.98-1.00) | 0.99 (0.98-1.00) | 0.97 (0.95-1.00) | 0.96 (0.91-1.01) | 0.98 (0.98-0.99) |
| ≥20% below threshold     | 0.97 (0.96-0.98) | 0.97 (0.95-0.98) | 0.99 (0.98-1.00) | 0.96 (0.95-0.98) | 0.96 (0.92-0.99) | 0.96 (0.90-1.02) | 0.97 (0.97-0.98) |
| P-for-trend <sup>‡</sup> | <0.001           | <0.001           | 0.058            | <0.001           | 0.058            | 0.166            | <0.001           |

HS, high school.

\* Adjusted for all other characteristic variables in table, age, and site.

† Additionally adjusted for race/ethnicity.

‡ P-for-trend was evaluated by using the median value for each category and fitting it as a continuous variable in the Poisson regression models using robust standard errors and adjusted by false discovery rate correction for multiple comparisons.

SUPPLEMENTARY DATA

**Supplementary Table 5. Age-standardized prevalence (95% confidence interval) of diabetes among adults aged 20 years or older in the PORTAL 2012-2013 cohort and the NHANES 2011-2012 and 2013-2016 interview populations**

|                                | PORTAL 2012-2013                                                                     | NHANES 2011-2012*                                                                    | NHANES 2013-2016†                                                 |
|--------------------------------|--------------------------------------------------------------------------------------|--------------------------------------------------------------------------------------|-------------------------------------------------------------------|
|                                | Diabetes definition                                                                  |                                                                                      |                                                                   |
|                                | FPG ≥126mg/dL, random PG ≥200mg/dL, HbA1c ≥6.5%, physician diagnosis, or medications | FPG ≥126mg/dL, 2-hr PG ≥200mg/dL, HbA1c ≥6.5%, or self-report of physician diagnosis | FPG ≥126mg/dL, HbA1c ≥6.5%, or self-report of physician diagnosis |
| <b>Overall</b>                 | 15.9 (15.8, 16.0)                                                                    | 14.3 (12.2-16.8)                                                                     | 14.0‡                                                             |
| <b>Sex</b>                     |                                                                                      |                                                                                      |                                                                   |
| Male                           | 18.4 (18.3, 18.5)                                                                    | 15.4 (13.2-17.9)                                                                     | 15.9                                                              |
| Female                         | 13.9 (13.8, 14.0)                                                                    | 13.8 (11.4-16.6)                                                                     | 12.2                                                              |
| <b>Race/ethnicity</b>          |                                                                                      |                                                                                      |                                                                   |
| Non-Hispanic                   |                                                                                      |                                                                                      |                                                                   |
| White                          | 12.2 (12.1, 12.3)                                                                    | 11.3 (9.0-14.1)                                                                      | 12.4                                                              |
| Black                          | 21.4 (21.3, 21.6)                                                                    | 21.8 (17.7-26.7)                                                                     | 17.9                                                              |
| Asian                          | 19.3 (19.2, 19.4)                                                                    | 20.6 (15.0-27.6)                                                                     | 15.3                                                              |
| Hawaiian/Pacific Islander      | 27.7 (27.4, 28.0)                                                                    | NA                                                                                   | NA                                                                |
| American Indian/Alaskan Native | 19.6 (19.1, 20.0)                                                                    | NA                                                                                   | NA                                                                |
| Hispanic                       | 22.2 (22.1, 22.3)                                                                    | 22.6 (18.4-27.5)                                                                     | 19.8                                                              |

FPG, fasting plasma glucose; 2-hr PG, 2-hour plasma glucose; HbA1c, hemoglobin A1c level; NA, not available; NHANES, National Health and Nutrition Examination Survey; PORTAL, Patient Outcomes Research to Advance Learning.

\*Data were from Menke et al. JAMA 2015;314:1021-1029.

†Data were from Mendola et al. NCHS Data Brief 2018:1-8.

‡Data on 95% confidence intervals were not reported.
